# Supplementary material
Source: HighWire-hosted journal article supplement (https://bmjopen.bmj.com/content/15/5/e101417)
Supplement: inline-supplementary-material-2 [file inline-supplementary-material-2.pdf]

**TAVISAR Trial**

**Patients with severe AVS (mean gradient > 04; jet velocity > 4,0 ) undergoing SAVR or TAVI**

**Enrollement and Group Allocation**

**SAVR ± CABG  
(BP or SAVI)  
N=1.020**

**TAVI  
N=1.020**

**Primary  
Outcomes**  
composite death,  
stroke,  
rehospitalization

**Secondary  
Outcomes**  
Survival, Stroke,  
Reoperation, Readmission,  
LV Remodeling, MACCE

**10 yrs Follow Up**
